# Supplementary material
Source: PubMed Central journal article supplement (PMC6334845)
Supplement: NIHMS994749-supplement-ESI_1.pdf [file NIHMS994749-supplement-ESI_1.pdf]

## **Supplementary Materials**

**Title: Diagnosis of traumatic brain injury using machine learning based miRNA signatures in nanomagnetically isolated brain-derived circulating extracellular vesicles**

**One sentence summary:** We developed a multiplexed circulating extracellular vesicle-based diagnostic for traumatic brain injury that can classify the severity, the time of the injury, and the history of multiple injuries in both a murine model and pilot clinical measurements.

**Authors:** J. Ko<sup>1</sup>, M. Hemphill<sup>1</sup>, Z. Yang<sup>1</sup>, E. Sewell<sup>1</sup>, YJ. Na<sup>2</sup>, D. K. Sandsmark<sup>3</sup>, M. Haber<sup>3</sup>, S. A. Fisher<sup>4</sup>, E. A. Torre<sup>1</sup>, Kirsten C. Svane<sup>7</sup>, Anton Omelchenko<sup>7</sup>, Bonnie L. Firestein<sup>7</sup>, R. Diaz-Arrastia<sup>3</sup>, J. Kim<sup>4,5</sup>, D. F. Meaney<sup>1,8</sup>, D. Issadore<sup>1,6</sup>

### **Affiliations:**

<sup>1</sup> Department of Bioengineering, University of Pennsylvania, Philadelphia, PA.

<sup>2</sup> Department of Medicine, Division of Nephrology, College of Physicians and Surgeons, Columbia University, New York, NY.

<sup>3</sup> Department of Neurology, University of Pennsylvania Perelman School of Medicine, Philadelphia, PA.

<sup>4</sup> Department of Biology, University of Pennsylvania, Philadelphia, PA.

<sup>5</sup> Department of Computer and Information Science, University of Pennsylvania, Philadelphia, PA.

<sup>6</sup> Department of Electrical and Systems Engineering, University of Pennsylvania, Philadelphia, PA.

<sup>7</sup> Department of Cell Biology and Neuroscience, Rutgers, the State University of New Jersey, NJ.

<sup>8</sup> Department of Neurosurgery, University of Pennsylvania Perelman School of Medicine, Philadelphia, PA.

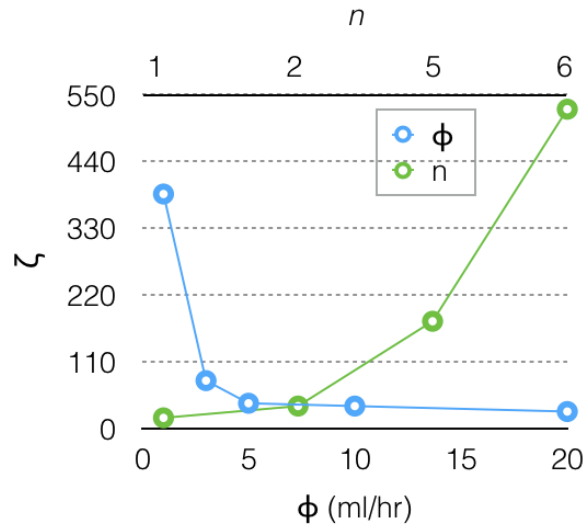

**Figure S1.** Enrichment versus flow rates ( $\phi$ , ml/hr) and number of membranes stacked ( $n$ ), which shows that capture rate decreases as a function of flow rate but can be increased by stacking multiple ExoTENPO membranes in series. Enrichment versus flow rate data were collected using  $n = 2$  membranes and enrichment versus number of membranes data were collected using  $\phi = 10$  ml/hr.

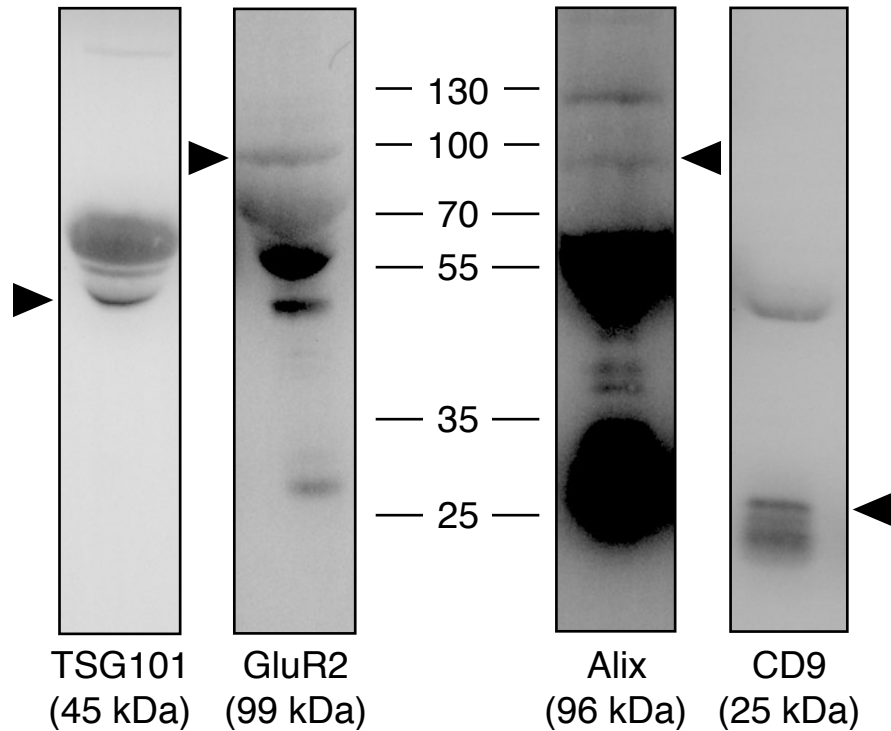

**Figure S2.** Western blot analysis for the presence of exosomal markers (TSG101, Alix, CD9) and GluR2, a surface protein that we used to capture specific types of vesicles. Mouse plasma (~1.5 ml) was run through the device and 20  $\mu$ g of proteins was loaded per lane. Multiple bands observed in the Western blots and the bands that are below the expected size may be degradation products. Those larger are most likely cross-reacting proteins or possible complexes of the proteins not fully denatured (e.g. CD9 shows a band at approximately double the size of the monomer, suggesting possible dimers). Many reports do not show the existence of these extra bands since the Western blots are cut to show only the expected band, but multiple bands are shown on some of the product sheets for the antibodies purchased (e.g. Anti-ALIX antibody, ab117600, Abcam).

| KEGG pathway                                              | p-value     | #genes | #miRNAs |
|-----------------------------------------------------------|-------------|--------|---------|
| Amphetamine addiction                                     | 9.88E-10    | 39     | 28      |
| ECM-receptor interaction                                  | 1.72E-08    | 32     | 28      |
| Axon guidance                                             | 6.33E-08    | 69     | 39      |
| Cocaine addiction                                         | 8.43E-06    | 25     | 19      |
| Hippo signaling pathway                                   | 8.43E-06    | 66     | 36      |
| Long-term potentiation                                    | 5.89E-05    | 39     | 29      |
| Glutamatergic synapse                                     | 5.89E-05    | 54     | 34      |
| Long-term depression                                      | 6.71E-05    | 29     | 30      |
| Oxytocin signaling pathway                                | 6.71E-05    | 77     | 39      |
| Mucin type O-Glycan biosynthesis                          | 7.83E-05    | 11     | 12      |
| Phosphatidylinositol signaling system                     | 0.000226338 | 40     | 30      |
| Estrogen signaling pathway                                | 0.000315628 | 44     | 29      |
| Gastric acid secretion                                    | 0.000315628 | 40     | 30      |
| Melanogenesis                                             | 0.000315628 | 50     | 31      |
| Wnt signaling pathway                                     | 0.000315628 | 66     | 38      |
| GnRH signaling pathway                                    | 0.000374091 | 45     | 29      |
| Choline metabolism in cancer                              | 0.000374091 | 49     | 36      |
| Thyroid hormone signaling pathway                         | 0.000374091 | 56     | 40      |
| Adherens junction                                         | 0.000502778 | 37     | 26      |
| Adrenergic signaling in cardiomyocytes                    | 0.000502778 | 68     | 38      |
| Thyroid hormone synthesis                                 | 0.000723891 | 30     | 27      |
| cAMP signaling pathway                                    | 0.001061806 | 85     | 41      |
| MAPK signaling pathway                                    | 0.001061806 | 106    | 46      |
| GABAergic synapse                                         | 0.001291407 | 34     | 27      |
| Arrhythmogenic right ventricular cardiomyopathy (ARVC)    | 0.001291407 | 35     | 29      |
| Proteoglycans in cancer                                   | 0.001291407 | 85     | 42      |
| Colorectal cancer                                         | 0.001424685 | 31     | 31      |
| Pathways in cancer                                        | 0.001522255 | 153    | 43      |
| Dopaminergic synapse                                      | 0.001778928 | 60     | 30      |
| Neurotrophin signaling pathway                            | 0.001809901 | 57     | 33      |
| Rap1 signaling pathway                                    | 0.00215094  | 86     | 42      |
| Regulation of actin cytoskeleton                          | 0.002586915 | 88     | 36      |
| Insulin secretion                                         | 0.002713245 | 41     | 33      |
| Calcium signaling pathway                                 | 0.00313986  | 76     | 39      |
| Endocytosis                                               | 0.003891426 | 87     | 34      |
| cGMP-PKG signaling pathway                                | 0.004374251 | 71     | 40      |
| Bacterial invasion of epithelial cells                    | 0.007378135 | 35     | 25      |
| Acute myeloid leukemia                                    | 0.007395526 | 28     | 29      |
| mTOR signaling pathway                                    | 0.007395526 | 30     | 34      |
| Type II diabetes mellitus                                 | 0.009062598 | 25     | 23      |
| Vascular smooth muscle contraction                        | 0.009086041 | 52     | 36      |
| Focal adhesion                                            | 0.010003783 | 83     | 41      |
| Ras signaling pathway                                     | 0.017436479 | 83     | 36      |
| Dilated cardiomyopathy                                    | 0.017436479 | 40     | 38      |
| Endocrine and other factor-regulated calcium reabsorption | 0.021778587 | 24     | 29      |
| Salivary secretion                                        | 0.023046574 | 35     | 31      |
| Notch signaling pathway                                   | 0.02348454  | 24     | 24      |
| Protein processing in endoplasmic reticulum               | 0.025880522 | 66     | 38      |
| Tyrosine metabolism                                       | 0.030277587 | 11     | 12      |
| Transcriptional misregulation in cancer                   | 0.030277587 | 67     | 40      |
| PI3K-Akt signaling pathway                                | 0.030277587 | 125    | 41      |
| Glioma                                                    | 0.035464845 | 26     | 31      |
| Sphingolipid signaling pathway                            | 0.035464845 | 50     | 33      |
| HIF-1 signaling pathway                                   | 0.036935049 | 47     | 31      |
| Fc gamma R-mediated phagocytosis                          | 0.037064748 | 37     | 27      |
| Insulin signaling pathway                                 | 0.037339799 | 57     | 34      |
| Prostate cancer                                           | 0.037442281 | 37     | 32      |
| Signaling pathways regulating pluripotency of stem cells  | 0.037442281 | 52     | 36      |
| Cholinergic synapse                                       | 0.03748049  | 51     | 31      |
| AMPK signaling pathway                                    | 0.041102219 | 52     | 33      |
| Lysine degradation                                        | 0.041504241 | 18     | 29      |
| mRNA surveillance pathway                                 | 0.041504241 | 40     | 36      |

**Figure S3.** Significantly enriched pathways (N=62, FDR corrected p value < 0.05) from KEGG.

The highlighted pathways (red) are relevant brain injury-related pathways.

| KEGG pathway                   | Top 3 microRNAs | Target genes                                                                                                            |
|--------------------------------|-----------------|-------------------------------------------------------------------------------------------------------------------------|
| Axon Guidance                  | mmu-miR-204-5p  | Efna5, Robo1, Pixna2, Nfatc3, Unc5d, Eph4, Ppp3r1, Efnb3, Eph7, Eph6                                                    |
|                                | mmu-miR-9-5p    | Ephb4, Rock1, Nfatc3, Ablim1, Cxcr4, Ntng1, Nrp1, Ephb1, Eph7, Pak2                                                     |
|                                | mmu-miR-96-5p   | L1cam, Efnb2, Gnai3, Arghefl2, Ntn4, Unc5d, Kras, Rac1, Eph3, Rasal, Ephb2, Ppp3r1                                      |
| Long-term potentiation         | mmu-miR-129-5p  | Calm1, Ep300, Gria2, Adcy1, Gnaq, Braf, Camk4, Grm5, Ppp3ca, Cacna1c, Crebbp                                            |
|                                | mmu-miR-7092-5p | Rps6ka1, Prkx, Grm1, Rap1b, Itpr3, Camk4, Calm2, Ppp3ca, Plcb1                                                          |
|                                | mmu-miR-96-5p   | Rsp6ka6, Map2kl, Itpr2, Gnaq, Kras, Braf, Camk4, Gria1, Ppp3r1, Itpr1                                                   |
| Glutamatergic synapse          | mmu-miR-129-5p  | Gria2, Trpc1, Adcy1, Gnaq, Grm5, Dlgapl, Ppp3ca, Cacna1c, Slc17a6                                                       |
|                                | mmu-miR-3112-5p | Prkx, Homer2, Gnb4, Grik2, Grin3a, Grik3, Slcla2, Grik5                                                                 |
|                                | mmu-miR-96-5p   | Gnai3, Itpr2, Slc1a1, Gnaq, Gria1, Ppp3r1, Itpr1, Slcla2, Adcy6                                                         |
| Oxytocin signaling pathway     | mmu-miR-96-5p   | Mef2c, Gnai3, Map2k1, Itp2, Cacna2dl, Cacnb1, Cacnb4, Ppp1r12c, Gnaq, Rgs2, Kras, Camk4, Cacna2d2, Ppp3r1, Itpr1, Adcy6 |
|                                | mmu-miR-7092-5p | Mef2c, Gnai3, Map2k1, Itp2, Cacna2dl, Cacnb1, Cacnb4, Ppp1r12c, Gnaq, Rgs2, Kras, Camk4, Cacna2d2, Ppp3r1, Itpr1, Adcy7 |
|                                | mmu-miR-204-5p  | Camk1d, Nfatc3, Gnaq, Cacng2, Camk4, Cacna2d4, Npr2, Ppp3r1, Cacna1c, Itpr1, Adcy6, Camkl                               |
| GABAergic synapse              | mmu-miR-96-5p   | Gabrb1, Gnai3, Slc12a5, Abat, Gphn, Gad2, Adyc6                                                                         |
|                                | mmu-miR-129-5p  | Cacna1b, Gabbr2, Adcy1, Gad2, Cacna1c                                                                                   |
|                                | mmu-miR-7092-5p | Gnai1, Slc12a5, Gabra2, Prkx, Adcy2, Gabra5, Gad2                                                                       |
| Dopaminergic synapse           | mmu-miR-96-5p   | Creb312, Gnai3, Ppp2r3a, Itpr2, Creb1, Creb311, Scn1a, Gnaqm, Mapk9, Gria1, Itpr1                                       |
|                                | mmu-miR-129-5p  | Calm1, Gsk3b, Gria2, Cacna1b, Ppp2ca, Gnaq, Ppp3ca, Cacna1c, Ppp2r5c                                                    |
|                                | mmu-miR-7092-5p | Gsk3b, Gnai1, Creb1, Prkx, Itpr3, Maa, Calm2, Ppp3ca, Plcb1, Atf2                                                       |
| Neurotrophin signaling pathway | mmu-miR-9-5p    | Sort1, Pik3r3, Map3k2, Psen1, Map3k1, Shc1, Ntf5, Sos1, Rap1b, Map2k7, Nfkb1, Mapkapk2                                  |
|                                | mmu-miR-96-5p   | Sort1, Ywhae, Rps6ka6, Map2k1, Grb2, Irs1, Kras, Braf, Mapk9, Rac1, Bcl2, Camk4, Frs2                                   |
|                                | mmu-miR-204-5p  | Rps6ka5, Rps6ka3, Shc1, Ntrk2, Sos1, Bcl2, Camk4, Frs2                                                                  |
| Cholinergic Synapse            | mmu-miR-7092-5p | Pik3r1, Gnai1, Creb1, Kcnq2, Prkx, Kcnq5, Itpr3, Camk4, Adcy3, Plcb1                                                    |
|                                | mmu-miR-96-5p   | Slc5a7, Creb312, Gnai3, Map2k1, Itpr2, Creb1, Creb311, Gna1, Kras, Bcl2, Camk4, Itpr1, Adcy6, Slc18a3                   |
|                                | mmu-miR-204-5p  | Creb1, Gnaq, Bcl2, Camk4, Cacna1c, Itpr1, Adcy6                                                                         |

**Figure S4.** KEGG pathways that are statistically significantly different (p value <0.05) for blast injured mice versus healthy mice. Top 3 miRNAs related to the pathways and their target genes are included.

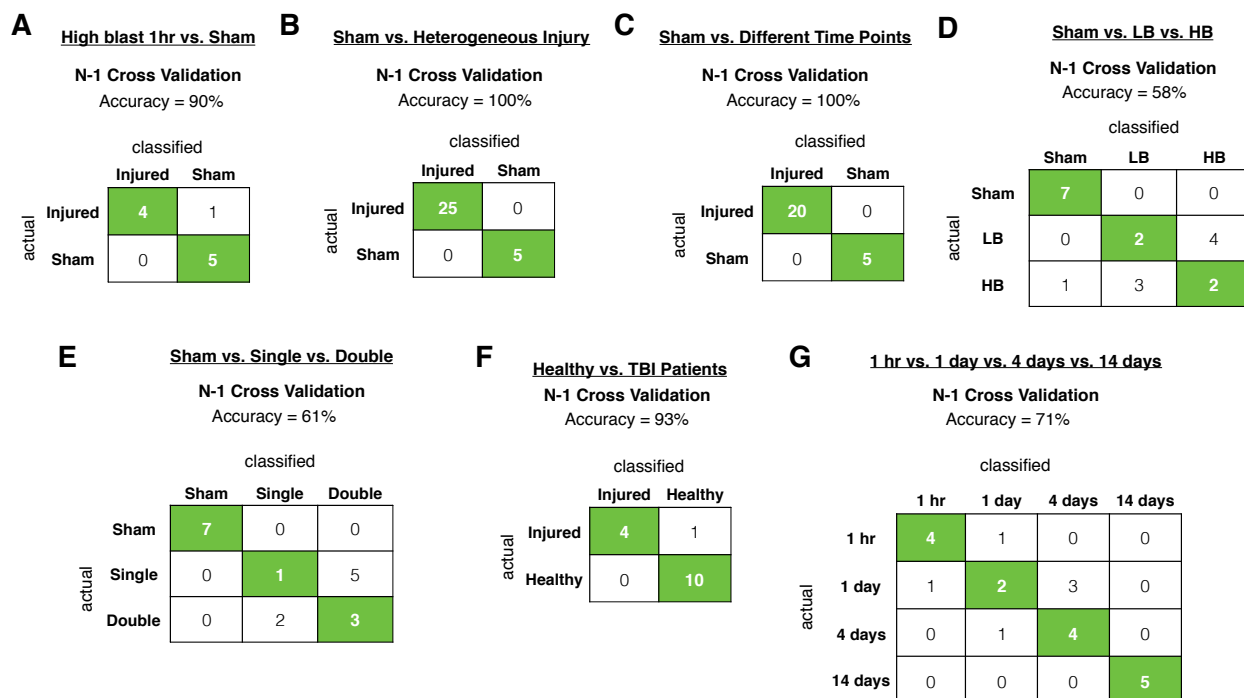

**Figure S5.** The performance evaluation of training sets using N-1 leave-one-out cross validation. Confusion matrix is made by comparing predicted labels to actual labels. **A.** A training set that compares high blast 1hr vs. sham control achieved Accuracy = 90%. **B.** A training set that compares sham control vs. heterogeneous injury achieved Accuracy = 100%. **C.** A training set that compares sham control vs. different time points achieved Accuracy = 100%. **D.** A training set that compares sham control vs. low blast (LB) vs. high blast (HB) achieved 58% accuracy. Here, misclassification mainly comes from classifying LB from HB. **E.** A training set that compares sham control vs. single injury vs. double injury achieved 61% accuracy. Here, misclassification mainly comes from classifying single injury from double injury. **F.** A training set that compares healthy donors vs. TBI patients achieved Accuracy = 93%. **G.** A training set that compares 1 hr vs. 1 day vs. 4 days vs. 14 days achieved Accuracy = 71%.

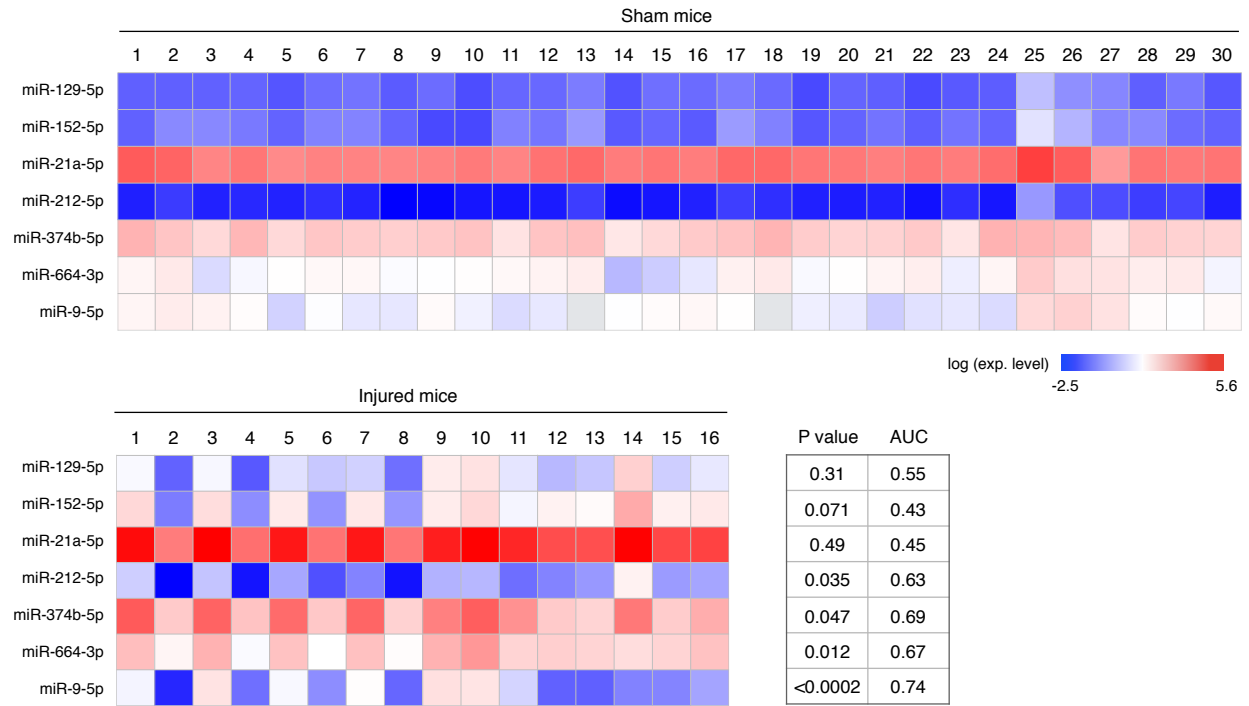

**Figure S6.** Heat map of expression level of EV miRNAs from different groups of mice (injured, control). Statistical difference of miRNA expression levels between two groups is reported as p value and AUC was calculated for individual miRNAs.

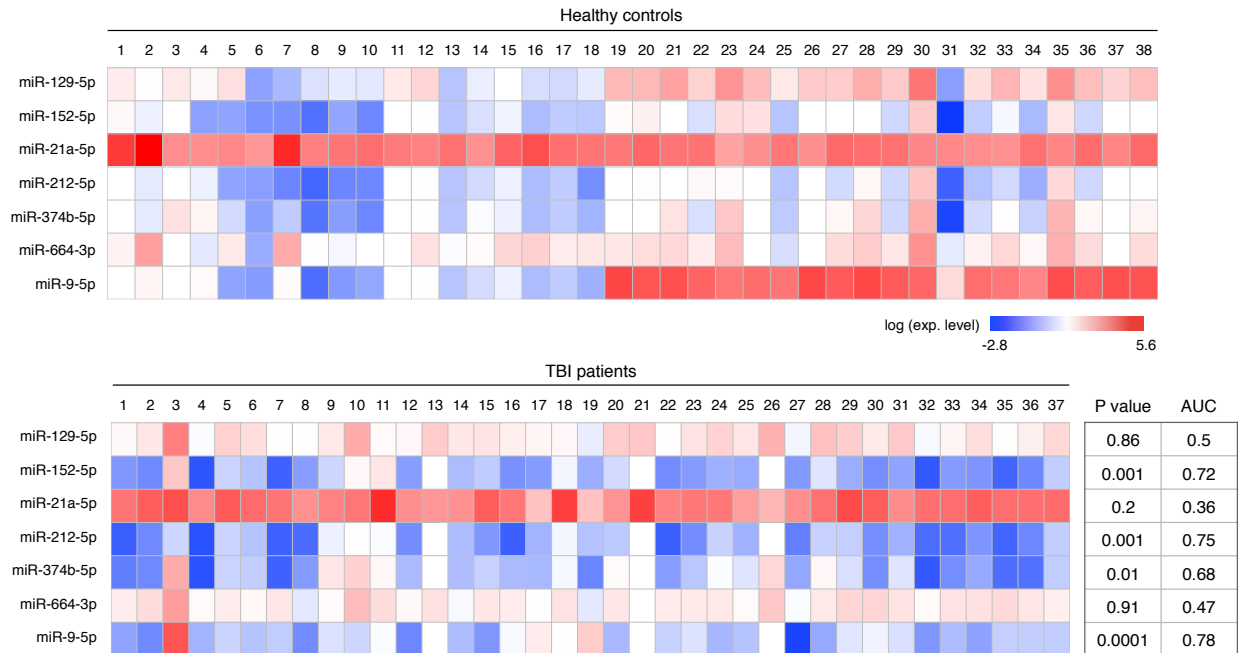

**Figure S7. Classification accuracy versus the number of samples in the training set.** To evaluate the effect of training set size, we performed N-1 cross validation for two classifications, by merging the training and evaluation set. We performed this test on the multi-state classification of Sham vs. a single injury vs. a double injury and sham vs. a low blast pressure injury (215 kPa) vs. a high blast pressure injury (415 kPa). As the number of samples in the training set increased, accuracy of the N-1 cross validations increased out to  $N = 60$  samples, indicating that data contains meaningfully separable signals.



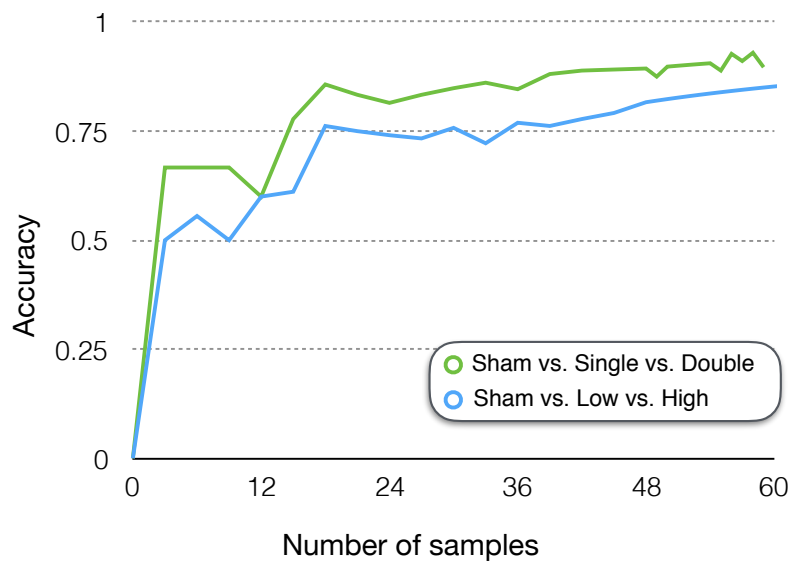

**Figure S8.** The performance evaluation of two different patient cohorts. **A.** A comparison for healthy controls versus patients with TBI and systemic injury. AUC = 0.94 was achieved with  $N = 44$  samples in the blinded test set. **B.** A comparison for healthy controls versus patients with TBI and no or mild systemic injury. AUC = 0.996 was achieved with  $N = 37$  samples in the blinded test set.

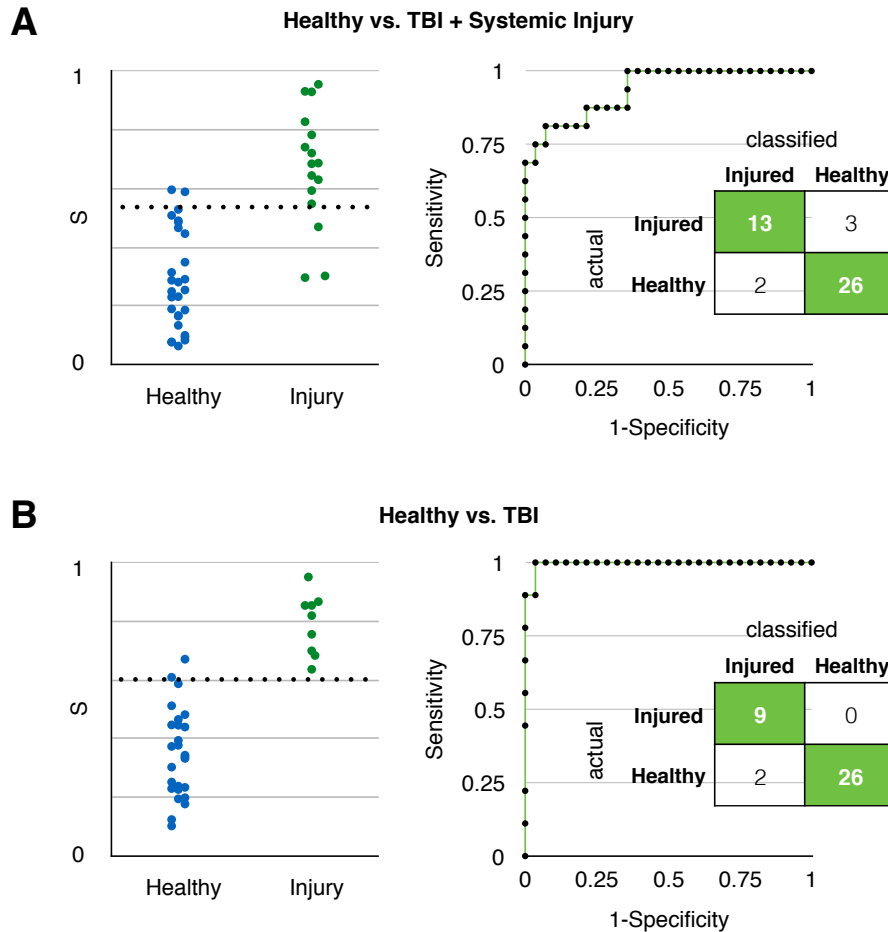

**Figure S9.** The benchmarking of our EV diagnostic to Quanterix's Single MOlecule Array (SIMOA) platform. **A.** Using this platform we measured known TBI biomarkers, including GFAP, UCH-L1, Tau, and NF-L. The concentrations of these markers were measured from TBI patients ( $N = 36$ ) and healthy controls ( $N = 15$ ) in a representative cohort from the same samples measured using our EV diagnostic. **B.** For none of the protein markers was there a significant difference between TBI patients and healthy controls ( $P > 0.05$ ), likely due to the variability of the injury severity (AIS 2-5) and time elapsed since the injury (0.4-120 hours) within our patient cohort. The AUCs from the protein markers ranged from 0.66-0.88, which were lower than what we have achieved (AUC = 0.9) using our EV diagnostic.

| Markers | Median (pg/ml) |       | AUC  | p-value |
|---------|----------------|-------|------|---------|
|         | Control        | TBI   |      |         |
| Tau     | 1.63           | 3.045 | 0.68 | 0.40    |
| NF-L    | 26.2           | 162.5 | 0.74 | 0.25    |

**Figure S10.** The benchmarking of our EV diagnostic to Quanterix's Single MOlecule Array (SIMOA) platform. Using this platform we measured known TBI biomarkers, including Tau and NF-L. The concentrations of these markers were measured from TBI patients ( $N = 36$ ) and healthy controls ( $N = 15$ ) in a representative cohort from the same samples measured using our EV diagnostic. For none of the protein markers was there a significant difference between TBI patients and healthy controls ( $P > 0.05$ ), likely due to the variability of the injury severity (AIS 2-5) and time elapsed since the injury (0.4-120 hours) within our patient cohort. The AUCs from the protein markers ranged from 0.66-0.88, which were lower than what we have achieved (AUC = 0.9) using our EV diagnostic.

| <b>Biomarker</b> | <b>AUC</b> | <b>Time elapsed since injury</b> | <b>Sample type</b> | <b>Reference</b>                             |
|------------------|------------|----------------------------------|--------------------|----------------------------------------------|
| UCH-L1           | 0.87       | <24 hours                        | Serum              | Diaz-Arrastia et al, 2014, J Neurotrauma     |
| GFAP             | 0.91       |                                  |                    |                                              |
| UCH-L1 + GFAP    | 0.94       |                                  |                    |                                              |
| T-tau            | 0.80       | 1 hr                             | Serum, plasma      | Shahim et al. 2014, JAMA Neurol.             |
| S-100B           | 0.67       |                                  |                    |                                              |
| NSE              | 0.55       |                                  |                    |                                              |
| UCH-L1           | 0.92       | 6 hrs                            | Serum              | Mondello et al. 2012, Neurosurgery           |
|                  | 0.80       | 12 hrs                           |                    |                                              |
|                  | 0.79       | 18 hrs                           |                    |                                              |
|                  | 0.75       | 24 hrs                           |                    |                                              |
| GFAP-BDP         | 0.88-0.90  | < 4 hours                        | Serum              | Papa et al. 2012, Ann. Emerg. Med            |
| UCH-L1           | 0.87       | 1 hr                             | Serum              | Papa et al. 2012, J. Trauma Acute Care Surg. |
| miR-16           | 0.89       | 25-48 hrs                        | Plasma             | Redell et al. 2010. J. Neurotrauma           |
| miR-92a          | 0.82       |                                  |                    |                                              |
| miR-765          | 0.86       |                                  |                    |                                              |

**Figure S11.** The predictive values of TBI patients using protein or miRNA biomarkers from serum or plasma.

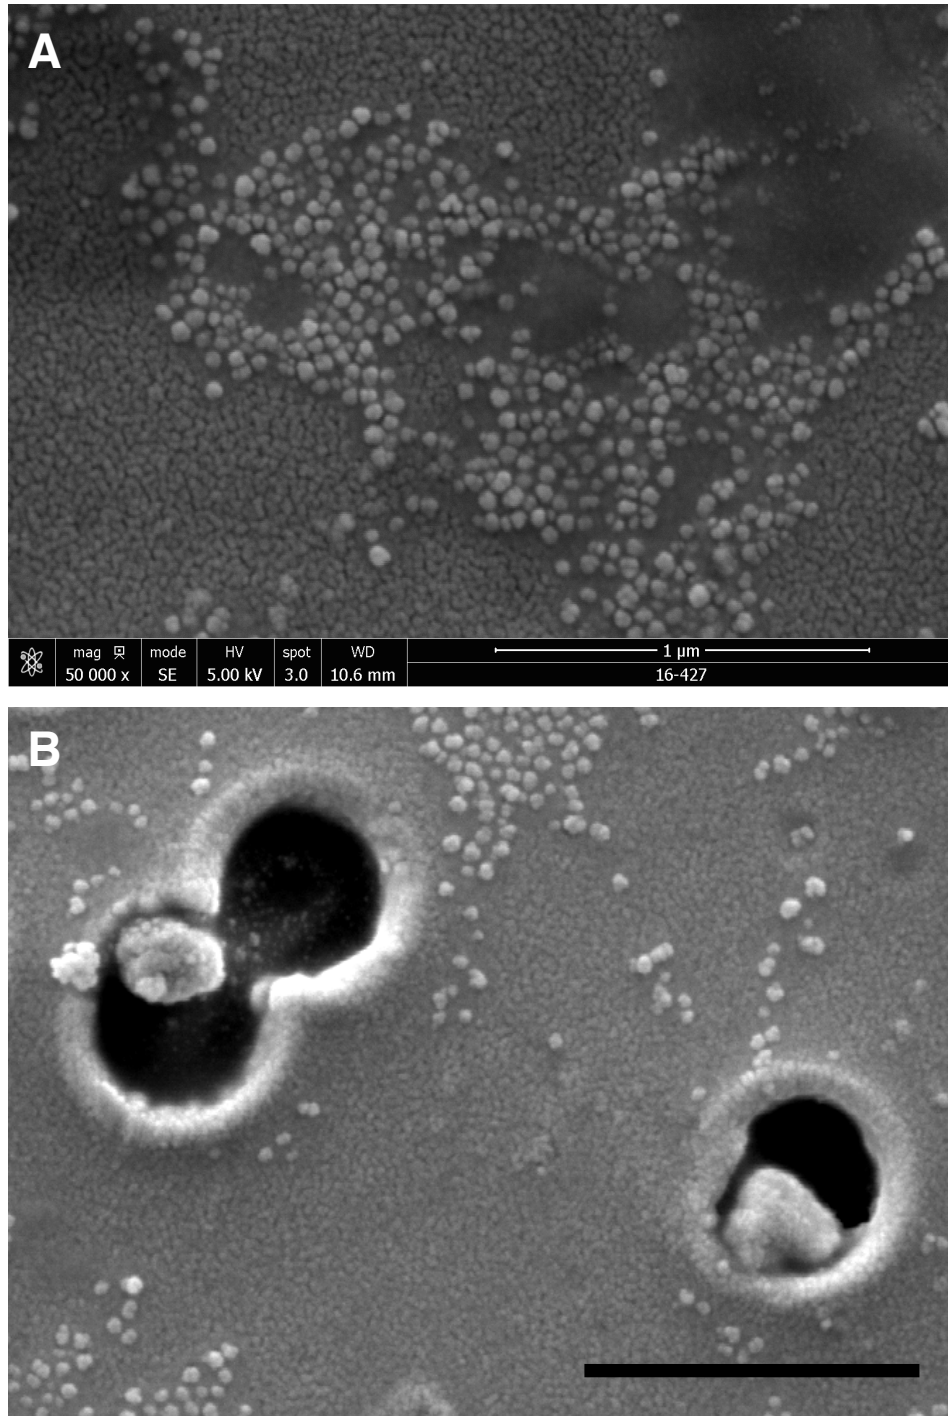

**Figure S12.** **A.** The SEM image of iron oxide magnetic nanoparticles ( $d = 50 \text{ nm}$ ). **B.** An SEM image of EVs captured at the edge of the nanopores. The scale bar is  $1 \mu\text{m}$ .

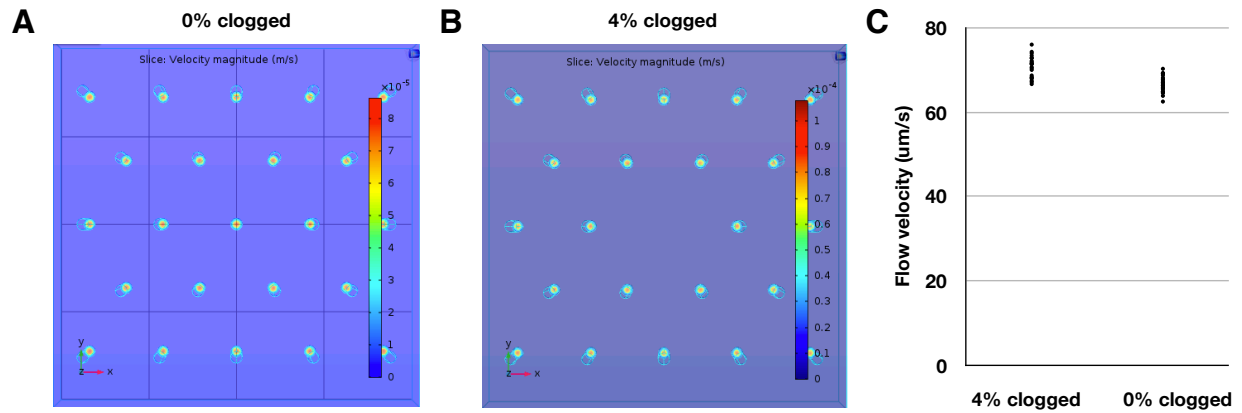

**Figure S13. Simulation of invariance of TENPO to clogging.** Clogging is simulated using Comsol Multiphysics finite element simulation package. We model an array of  $N = 23$  pores with a diameter of 600 nm in a polycarbonate membrane that was 5  $\mu\text{m}$  thick. We use symmetric boundary conditions to approximate an infinite array of pores. The pores are spaced by 4  $\mu\text{m}$  to approximate a pore density of  $10^7 \text{ cm}^{-2}$  and the flow rate is set at 3 mL/hr. We simulate clogging by comparing an unclogged array (**A**) with an array with one pore occluded (**B**), simulating a much higher rate of pore occlusion (4%) than observed using our device with plasma ( $<0.1\%$ ). In the clogged device, as expected, the flow is evenly distributed to the other pores (**C**), resulting in robust device operation.

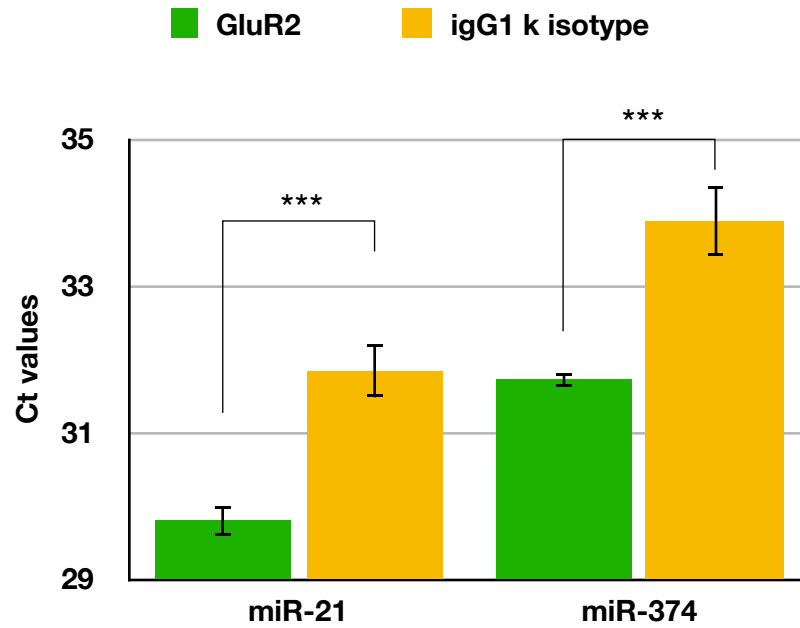

**Figure S14.** The specificity of the ExoTENPO device tested using isotype control (biotin mouse igG1 k isotype, Biolegend) antibody. Two highly expressed genes were selected for comparison and measured using QPCR. PCR threshold cycle Ct values of exosome-specific capture were compared to those of control antibody and fold change was quantified. Error bars represent Standard Error from two device replicates and three PCR replicates.(P < 0.005)
